# Supplementary material for: dyschronic, a Drosophila Homolog of a Deaf-Blindness Gene, Regulates Circadian Output and Slowpoke Channels
Source: PLOS journal article supplement (doi:10.1371/journal.pgen.1002671), 2012-04-19
Supplement: S1 (10.1371/journal.pgen.1002671.s001) [file journal.pgen.1002671.s001]

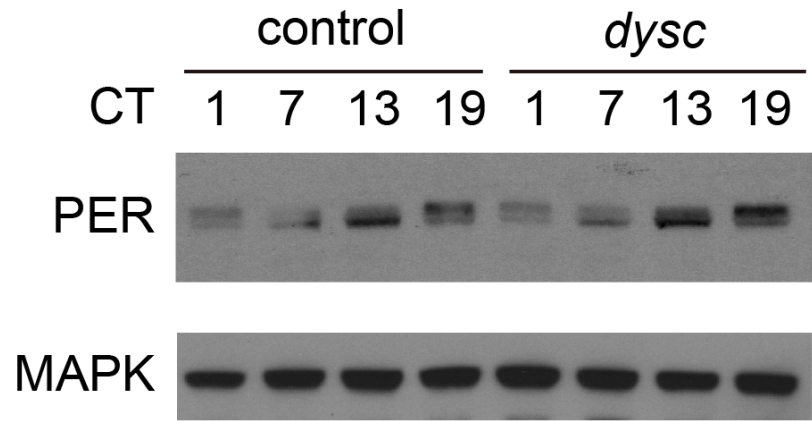

Figure S1
